# Supplementary material
Source: PubMed Central journal article supplement (PMC6459217)
Supplement: jamaoncol-5-497-s002.pdf [file jamaoncol-5-497-s002.pdf]

## Supplementary Online Content

Ramsey SD, Unger JM, Baker LH, et al. Prevalence of hepatitis B virus, hepatitis C virus, and HIV infection among patients with newly diagnosed cancer from academic and community oncology practices. *JAMA Oncol*. Published online January 17, 2019. doi:10.1001/jamaoncol.2018.6437

**eTable 1.** Definitions of HBV, HCV, and HIV Infection Based on Individual Viral Test Results

**eTable 2:** Demographic and Cancer Characteristics for Registered vs Patients Evaluated for Participation

**eTable 3:** S1204 Cancer Types for "Other" Cancers, per Cancer Therapy Evaluation Program (CTEP) Category

**eTable 4:** HBV, HCV, and HIV Prevalence Estimates with 95% CI by Cancer Type

**eTable 5:** Scheduled Treatments for Patients Diagnosed with Past, Chronic, and Negative HBV

**eTable 6:** Six-Month Treatment Outcomes for Viral-Positive Patients

This supplementary material has been provided by the authors to give readers additional information about their work.

**eTable 1. Definitions of HBV, HCV, and HIV Infection Based on Individual Viral Test Results**

| HBV Standard Test Results |                                      |                                      | HBV Infection                        |
|---------------------------|--------------------------------------|--------------------------------------|--------------------------------------|
| HBsAg                     | anti-HBc <sup>1</sup>                | anti-HBs                             |                                      |
| Positive                  | Positive/<br>Negative/<br>Not tested | Negative/<br>Not tested              | Positive - chronic infection         |
| Negative                  | Positive                             | Negative/<br>Positive/<br>Not tested | Positive - past infection            |
| Not tested                | Positive                             | Not tested                           | Positive – past infection (probable) |
| Negative/<br>Not tested   | Negative                             | Positive                             | Negative; immune <sup>2</sup>        |
| Negative/<br>Not tested   | Negative/<br>Not tested              | Negative/<br>Not tested              | Negative (probable)                  |

**HBV Testing Description:** Complete testing for HBV infection specified testing for each of the following tests: hepatitis B surface antigen (HBsAg), hepatitis B core antibody (anti-HBc) and hepatitis B surface antibody (anti-HBs). Complete testing was not available on all patients; therefore, HBV viral status is based on key testing components, as shown in the table above.

| HCV Standard Test Results            |                       | HCV Infection         |
|--------------------------------------|-----------------------|-----------------------|
| Anti-HCV Screening Test <sup>3</sup> | HCV RNA               |                       |
| Positive/<br>Not tested              | Detectable            | Positive <sup>4</sup> |
| Positive/<br>Negative/<br>Not tested | Undetectable          | Negative              |
| Negative                             | Not done (not needed) | Negative              |
| Positive                             | Not tested            | Unknown               |

**HCV Testing Description:** Complete testing for HCV infection specified a screening test (anti-HCV) followed by a confirmatory test (HCV RNA) if the screening test was positive; a negative screening test was sufficient to indicate negative HCV status. Complete testing was not available on all patients; therefore, HCV viral status is based on key testing components, as shown in the table above.

| HIV Standard Test Results       |                         |                             | HIV Infection         |
|---------------------------------|-------------------------|-----------------------------|-----------------------|
| HIV Screening Test <sup>5</sup> | Western Blot            | HIV RNA                     |                       |
| Positive/<br>Not tested         | Positive/<br>Not tested | Detectable                  | Positive <sup>6</sup> |
| Negative                        | Negative/<br>Not tested | Undetectable/<br>Not tested | Negative              |
| Positive/<br>Not tested         | Not tested              | Undetectable                | Negative              |

**HIV Testing Description:** Complete testing for HIV infection specified an antibody and/or antigen screening test followed by a confirmatory test (Western Blot) if the screening test was positive; a negative screening test was sufficient to indicate negative HIV status. Complete testing was not available on all patients; therefore, HIV viral status is based on key testing components, as shown in the table above.

1 – Total or IgG anti-HBc

2 – Includes one patient with missing HBsAg and anti-HBc results with positive anti-HBs result.

3 – CIA, EIA or other screening test (per standard of care at the clinic)

4 – Includes one patient classified as chronic HCV status after direct acting antiviral therapy with subsequent negative HCV RNA, and one patient classified as chronic HCV based on ability to perform HCV genotyping.

5 – Antibody and/or antigen screen (per standard of care at the clinic)

6 – Includes 32 patients with a documented history of HIV, regardless of current screening or HIV RNA results.

CIA, chemiluminescence immunoassay; EIA, enzyme immunoassay

**eTable 2. Demographic and Cancer Characteristics for Registered vs Patients Evaluated for Participation**

| Demographic                      | Registered Patients<br>n (%) | Screened Patients<br>n (%) |
|----------------------------------|------------------------------|----------------------------|
| TOTAL                            | 3092 (100%)                  | 15,666 (100%)              |
| <b>GENDER</b>                    |                              |                            |
| Female                           | 1864 (60%)                   | 8839 (59%)                 |
| Male                             | 1228 (40%)                   | 6159 (41%)                 |
| Unknown                          | 0                            | 668                        |
| <b>RACE</b>                      |                              |                            |
| White                            | 2308 (75%)                   | 10108 (77%)                |
| Black or African American        | 561 (18%)                    | 2127 (16%)                 |
| Asian                            | 103 (3%)                     | 676 (5%)                   |
| Pacific Islander                 | 12 (0%)                      | 58 (0%)                    |
| Native American or Alaska Native | 20 (1%)                      | 98 (1%)                    |
| Multi-racial                     | 9 (0%)                       | 13 (0%)                    |
| Unknown                          | 79                           | 2586                       |
| <b>ETHNICITY</b>                 |                              |                            |
| Hispanic                         | 569 (18%)                    | 1831 (15%)                 |
| Not Hispanic                     | 2507 (81%)                   | 10569 (85%)                |
| Unknown                          | 16                           | 3266                       |
| <b>AGE</b>                       |                              |                            |
| 18-29                            | 66 (2%)                      | 263 (2%)                   |
| 30-39                            | 175 (6%)                     | 626 (4%)                   |
| 40-49                            | 401 (13%)                    | 1539 (10%)                 |
| 50-59                            | 841 (27%)                    | 3446 (23%)                 |
| 60-69                            | 965 (31%)                    | 4674 (31%)                 |
| 70 and greater                   | 644 (21%)                    | 4426 (30%)                 |
| Unknown                          | 0                            | 692                        |
| <b>CANCER TYPE</b>               |                              |                            |
| Bladder                          | 62 (2%)                      | 321 (2%)                   |
| Breast                           | 1072 (35%)                   | 4350 (28%)                 |
| Colon/colorectal                 | 366 (12%)                    | 1473 (9%)                  |
| Endometrial                      | 25 (1%)                      | 283 (2%)                   |
| Kidney                           | 31 (1%)                      | 253 (2%)                   |
| Leukemia                         | 75 (2%)                      | 257 (2%)                   |
| Liver                            | 63 (2%)                      | 365 (2%)                   |
| Lung                             | 363 (12%)                    | 1721 (11%)                 |
| Lymphoma                         | 232 (8%)                     | 753 (5%)                   |
| Melanoma                         | 32 (1%)                      | 219 (1%)                   |
| Non-melanoma skin                | 11 (0%)                      | 119 (1%)                   |
| Prostate                         | 102 (3%)                     | 748 (5%)                   |
| Thyroid                          | 9 (0%)                       | 110 (1%)                   |
| Other                            | 642 (21%)                    | 4600 (29%)                 |
| Missing                          | 7                            | 94                         |

**eTable 3. S1204 Cancer Types for "Other" Cancers, per Cancer Therapy Evaluation Program (CTEP) Category**

| <b>CTEP CATEGORY</b>                        | <b>Number of patients</b> |
|---------------------------------------------|---------------------------|
| AIDS-related Malignancy and Condition       | 6                         |
| Bone Neoplasm                               | 10                        |
| Breast Neoplasm                             | 2                         |
| CNS Neoplasm (Primary Tumor)                | 16                        |
| Endocrine Neoplasm                          | 45                        |
| Eye Neoplasm                                | 1                         |
| Germ Cell Neoplasm                          | 28                        |
| Hematopoietic Neoplasm (excluding Leukemia) | 2                         |
| Kidney Neoplasm                             | 31                        |
| Lung, Mediastinal and Pleural Neoplasm      | 4                         |
| Miscellaneous Neoplasm                      | 16                        |
| Reproductive System Neoplasm, Female        | 100                       |
| Reproductive System Neoplasm, Male          | 6                         |
| Skin Neoplasm                               | 43                        |
| Soft Tissue Neoplasm                        | 21                        |
| Urothelial Tract Neoplasm                   | 61                        |
| <b>TOTAL</b>                                | <b>392</b>                |

**eTable 4. HBV, HCV, and HIV Prevalence Estimates with 95% CI by Cancer Type**

|                             | Chronic HBV       |            | Past HBV           |            | HCV               |            | HIV               |           |
|-----------------------------|-------------------|------------|--------------------|------------|-------------------|------------|-------------------|-----------|
|                             | Rate (n/d)        | 95% CI     | Rate (n/d)         | 95% CI     | Rate (n/d)        | 95% CI     | Rate (n/d)        | 95% CI    |
| <b>All patients</b>         | 0.6%<br>(19/3050) | 0.4%-1.0%  | 6.5%<br>(197/3050) | 5.6%-7.4%  | 2.4%<br>(71/2990) | 1.9%-3.0%  | 1.1%<br>(34/3045) | 0.8%-1.6% |
| <b>Previously diagnosed</b> | 0.4%<br>(11/3050) | 0.2%-0.6%  | 0.8%<br>(25/3050)  | 0.5%-1.2%  | 1.6%<br>(49/2990) | 1.2%-2.2%  | 1.1%<br>(32/3045) | 0.7%-1.5% |
| <b>Newly diagnosed</b>      | 0.3%<br>(8/3050)  | 0.1%-0.5%  | 5.7%<br>(172/3050) | 4.9%-6.5%  | 0.7%<br>(22/2990) | 0.5%-1.1%  | 0.1%<br>(2/3045)  | 0.0%-0.2% |
| <b>By Cancer Type</b>       |                   |            |                    |            |                   |            |                   |           |
| <b>Blood/Marrow</b>         | 0.5%<br>(2/369)   | 0.1%-1.9%  | 4.3%<br>(16/369)   | 2.5%-7.0%  | 2.5%<br>(9/364)   | 1.1%-4.6%  | 1.9%<br>(7/369)   | 0.8%-3.9% |
| <b>Breast</b>               | 0.4%<br>(4/1058)  | 0.1%-1.0%  | 6.2%<br>(66/1058)  | 4.9%-7.9%  | 0.9%<br>(9/1046)  | 0.4%-1.6%  | 0.2%<br>(2/1056)  | 0.0%-0.7% |
| <b>Colorectal</b>           | 0.6%<br>(2/362)   | 0.1%-2.0%  | 5.0%<br>(18/362)   | 3.0%-7.7%  | 2.0%<br>(7/356)   | 0.8%-4.0%  | 1.4%<br>(5/362)   | 0.4%-3.2% |
| <b>Liver</b>                | 6.5%<br>(4/62)    | 1.8%-15.7% | 8.1%<br>(5/62)     | 2.7%-17.8% | 17.3%<br>(9/52)   | 8.2%-30.3% | 0.0%<br>(0/61)    | 0.0%-5.9% |
| <b>GI, Other</b>            | 1.3%<br>(3/235)   | 0.3%-3.7%  | 9.4%<br>(22/235)   | 6.0%-13.8% | 1.3%<br>(3/228)   | 0.3%-3.8%  | 2.1%<br>(5/235)   | 0.7%-4.9% |
| <b>Head &amp; Neck</b>      | 0.9%<br>(1/111)   | 0.0%-4.9%  | 8.1%<br>(9/111)    | 3.8%-14.8% | 4.7%<br>(5/106)   | 1.6%-10.7% | 0.9%<br>(1/111)   | 0.0%-4.9% |
| <b>Lung</b>                 | 0.6%<br>(2/356)   | 0.1%-2.0%  | 8.7%<br>(31/356)   | 6.0%-12.1% | 4.9%<br>(17/347)  | 2.9%-7.7%  | 1.1%<br>(4/356)   | 0.3%-2.8% |
| <b>Prostate</b>             | 0%<br>(0/100)     | 0.0%-3.6%  | 12.0%<br>(12/100)  | 6.4%-20.0% | 3.1%<br>(3/98)    | 0.6%-8.7%  | 1.0%<br>(1/100)   | 0.0%-5.5% |
| <b>Other</b>                | 0.3%<br>(1/392)   | 0.0%-1.4%  | 4.6%<br>(18/392)   | 2.7%-7.2%  | 2.3%<br>(9/388)   | 1.1%-4.4%  | 2.3%<br>(9/390)   | 1.1%-4.3% |
| <b>Missing</b>              | 5                 |            |                    |            | 5                 |            | 5                 |           |

For each specified group of patients with a given cancer type, n = numerator and d = denominator.

**eTable 5. Scheduled Treatments for Patients Diagnosed With Past, Chronic, and Negative HBV**

| Type of Scheduled Therapy | HBV Status<br>% (n) |                   |                      |
|---------------------------|---------------------|-------------------|----------------------|
|                           | Past<br>(n=197)     | Chronic<br>(n=19) | Negative<br>(n=2834) |
| Cytotoxic chemotherapy    | 139 (70.6%)         | 13 (68.4%)        | 1931 (68.1%)         |
| Steroids                  | 22 (11.2%)          | 3 (15.8%)         | 329 (11.6%)          |
| Radiation therapy         | 73 (37.1%)          | 6 (31.6%)         | 1005 (35.5%)         |
| Immunotherapy             | 5 (2.5%)            | 0                 | 48 (1.7%)            |
| Biologic therapy          | 8 (4.1%)            | 4 (21.1%)         | 154 (5.4%)           |
| Hormone therapy           | 45 (22.8%)          | 1 (5.3%)          | 525 (18.5%)          |
| Surgery                   | 55 (27.9%)          | 3 (15.8%)         | 917 (32.4%)          |
| Bone marrow transplant    | 0                   | 0                 | 10 (0.4%)            |
| Rituximab                 | 6 (3.1%)            | 0                 | 82 (2.9%)            |
| Other antibody therapy    | 1 (0.5%)            | 0                 | 3 (0.1%)             |

A greater proportion of patients with chronic HBV received biologic therapy compared to patients with past HBV ( $p=.01$ ) and compared to negative HBV patients ( $p=.02$ ). No other differences between groups were evident.

**eTable 6. Six-month Treatment Outcomes for Viral-Positive Patients**

|             | Any antiviral or antiretroviral drug use |                                 | Change in cancer treatments |                                 | Changed cancer treatments due to viral positive status |                                 | Changed cancer treatments due to viral positive status & added antiviral/antiretroviral therapy |                                 |
|-------------|------------------------------------------|---------------------------------|-----------------------------|---------------------------------|--------------------------------------------------------|---------------------------------|-------------------------------------------------------------------------------------------------|---------------------------------|
|             | Overall                                  | Newly vs. previously diagnosed* | Overall                     | Newly vs. previously diagnosed* | Overall                                                | Newly vs. previously diagnosed* | Overall                                                                                         | Newly vs. previously diagnosed* |
| Past HBV    | 11.8%                                    | 8.4% vs. 33.3%<br>P=.004        | 59.2%                       | 62.6% vs. 38.1%<br>P=.05        | 7.9%                                                   | 7.6% vs. 9.5%<br>P=.67          | 5.3%                                                                                            | 5.3% vs. 4.8%<br>P=1.0          |
| Chronic HBV | 73.3%                                    | 50.0% vs. 88.9%<br>P=.24        | 53.3%                       | 55.0% vs. 55.6%<br>P=1.0        | 13.3%                                                  | 0% vs. 22.2%<br>P=.49           | 13.3%                                                                                           | 0% vs. 22.2%<br>P=.51           |
| HCV         | 8.2%                                     | 0% vs. 11.8%<br>P=.30           | 55.1%                       | 53.3% vs. 55.9%<br>P=1.0        | 6.1%                                                   | 0% vs. 8.8%<br>P=.54            | 2.0%                                                                                            | 0% vs. 2.9%<br>P=1.0            |
| HIV         | 66.7%                                    | 100% vs. 65.5%<br>P=1.0         | 50.0%                       | 0% vs. 51.7%<br>P=1.0           | 16.7%                                                  | 0% vs. 17.2%<br>P=1.0           | 13.3%                                                                                           | 0% vs. 13.8%<br>P=1.0           |
| Any virus   | 19.6%                                    | 9.5% vs. 32.7%<br>P<.001        | 58.5%                       | 65.1% vs. 50.0%<br>P=.03        | 8.0%                                                   | 6.3% vs. 10.2%<br>P=0.33        | 6.3%                                                                                            | 4.8% vs. 8.2%<br>P=.40          |

\* P-values derived from Fisher exact tests.

In total, 292 patients were viral positive for one or more viruses. Treatment outcome data were available for 224 (76.7%) at 6 months (11 did not have 6-month data submitted, and 57 indicated that 6 month data were not available).
